# Supplementary material for: A smart strategy to fabricate Ru nanoparticle inserted porous carbon nanofibers as highly efficient levulinic acid hydrogenation catalysts
Source: Royal Society of Chemistry journal article supplement (doi:10.1039/c5gc02802g), 2016-01-01
Supplement: c5gc02802g1.pdf [file c5gc02802g1.pdf]

Supporting Information for

**A smart strategy to fabricate Ru nanoparticle inserted porous carbon nanofibers  
as highly efficient levulinic acid hydrogenation catalysts**

Ying Yang,<sup>\*a</sup> Cheng-Jun Sun,<sup>b</sup> Dennis E. Brown,<sup>c</sup> Liqiang Zhang,<sup>a</sup> Feng Yang,<sup>a</sup>

Hairui Zhao,<sup>a</sup> Yue Wang,<sup>a</sup> Xiaohui Ma,<sup>a</sup> Xin Zhang<sup>a</sup> and Yang Ren<sup>b</sup>

Email address: [catalyticsscience@163.com](mailto:catalyticsscience@163.com)

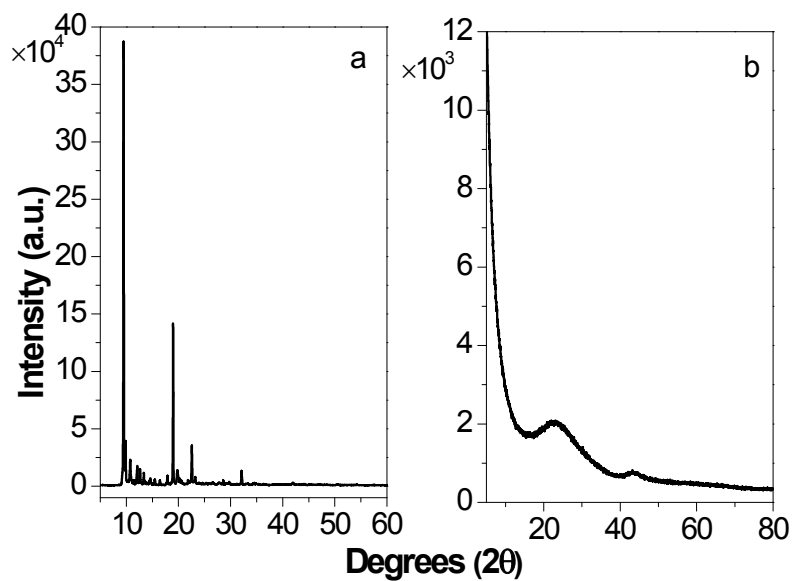

**Fig. S1** X-ray diffraction patterns of (a) 0.300Ru-ZnBTC and (b) 0.300Ru-CNF.

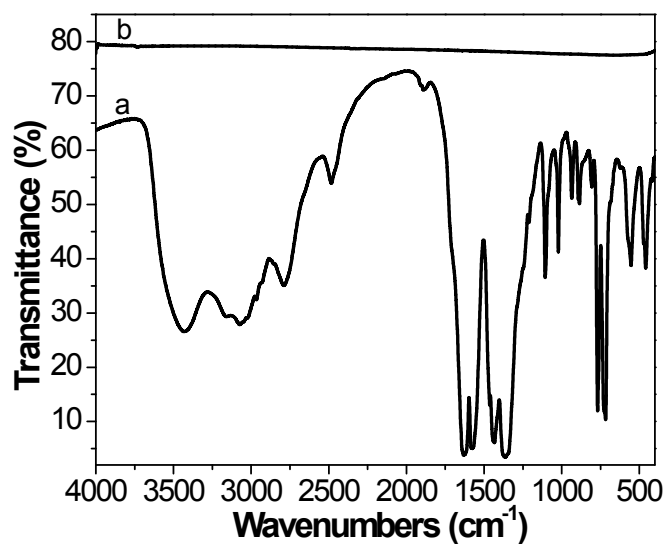

**Fig. S2** FT-IR spectra of (a) 0.300Ru-ZnBTC and (b) 0.300Ru-CNF.

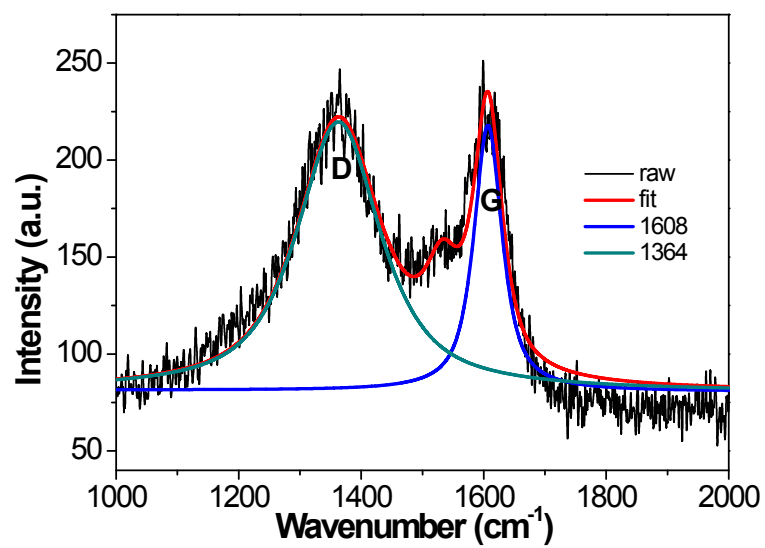

Fig. S3 Raman spectrum of 0.300Ru-CNF.

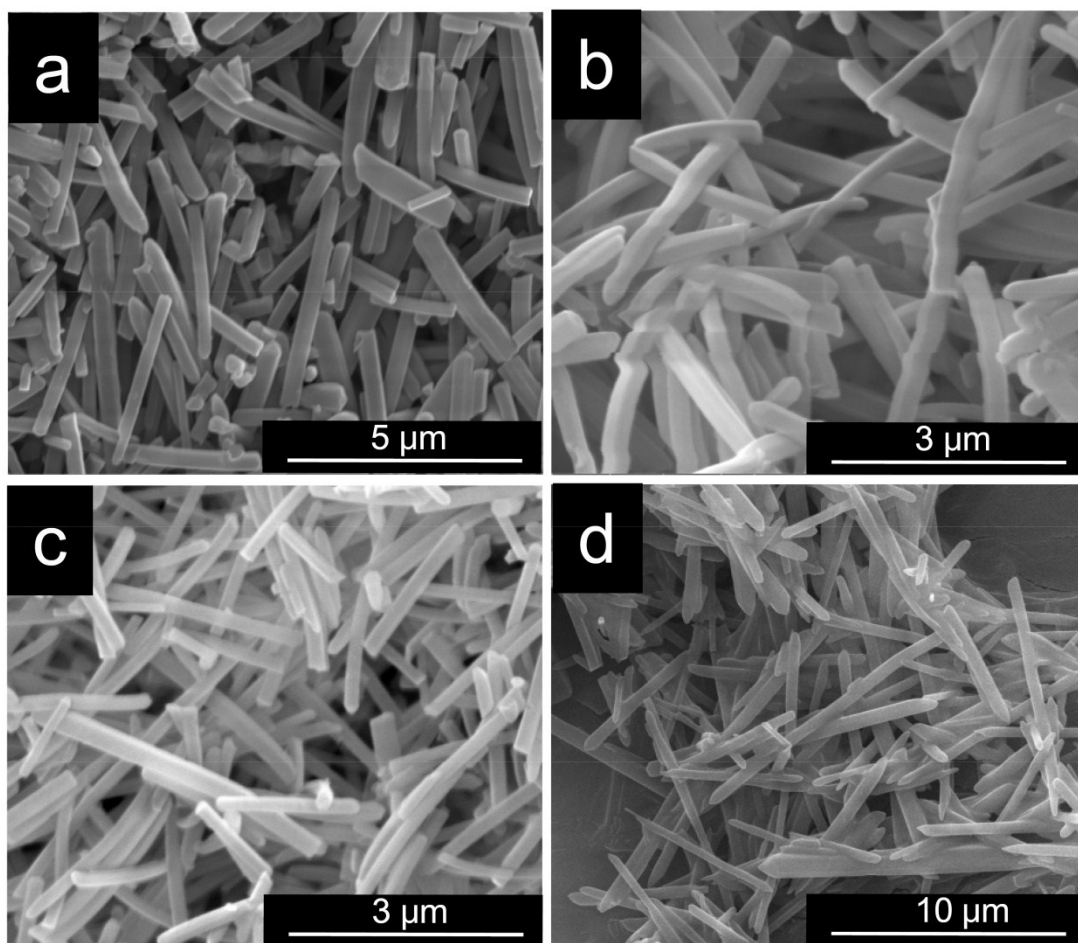

**Fig. S4** SEM images of (a) 0.025Ru-CNF, (b) 0.050Ru-CNF, (c) 0.100Ru-CNF and (d) 0.500Ru-CNF.

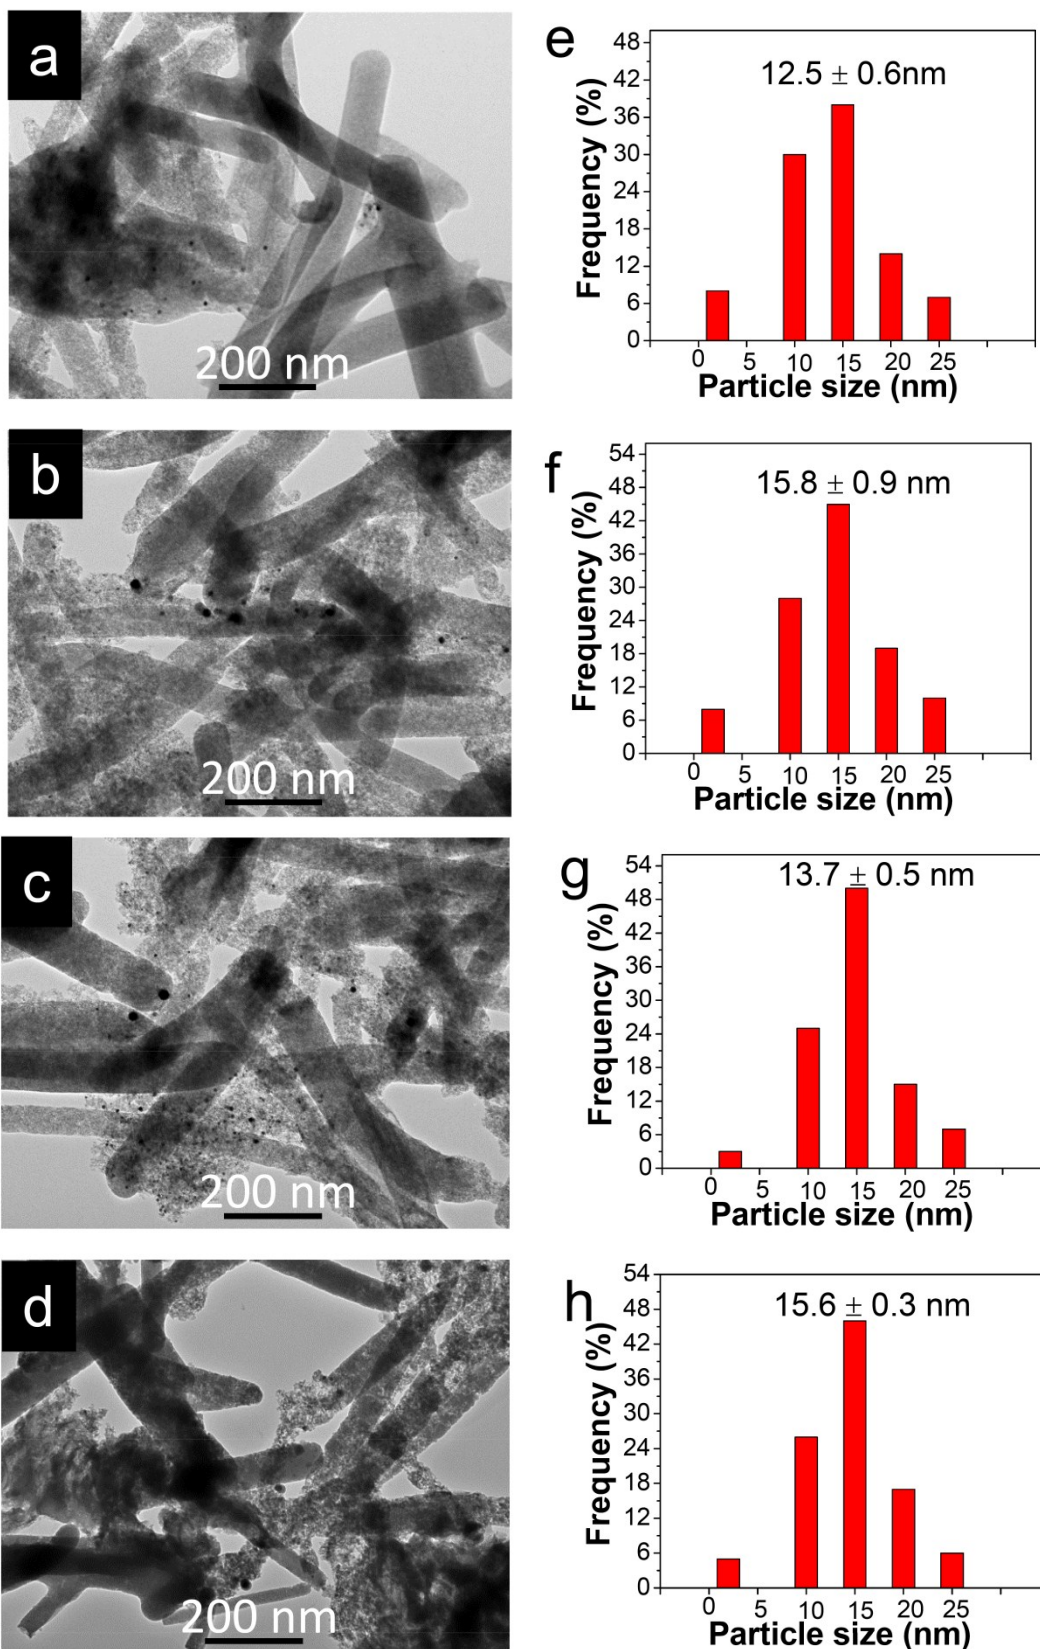

**Fig. S5** TEM image and the corresponding particle size distribution for (a,e) 0.025Ru-CNF, (b,f) 0.050Ru-CNF, (c,g) 0.100Ru-CNF and (d,h) 0.500Ru-CNF.

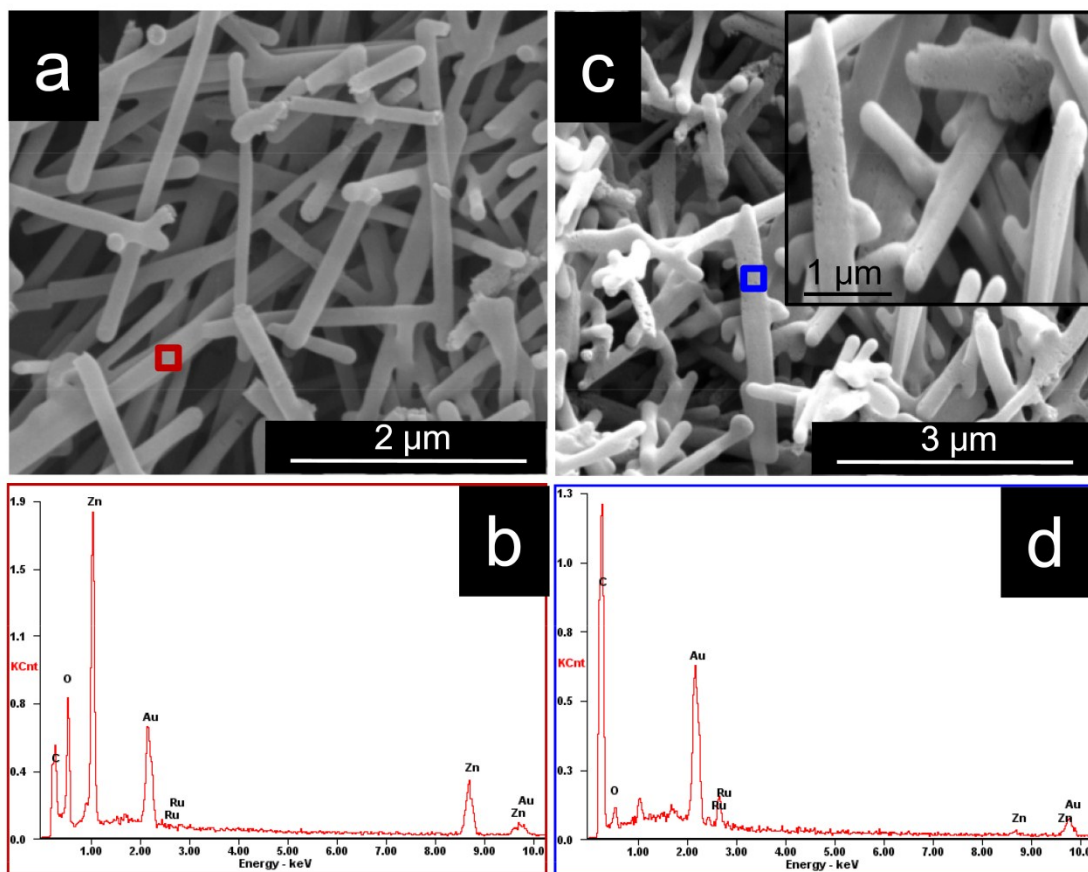

**Fig. S6** (a,c) SEM image and (b,d) the corresponding EDS analysis for (a,b) 0.300Ru-ZnCNF-750 and (c,d) 0.300Ru-CNF

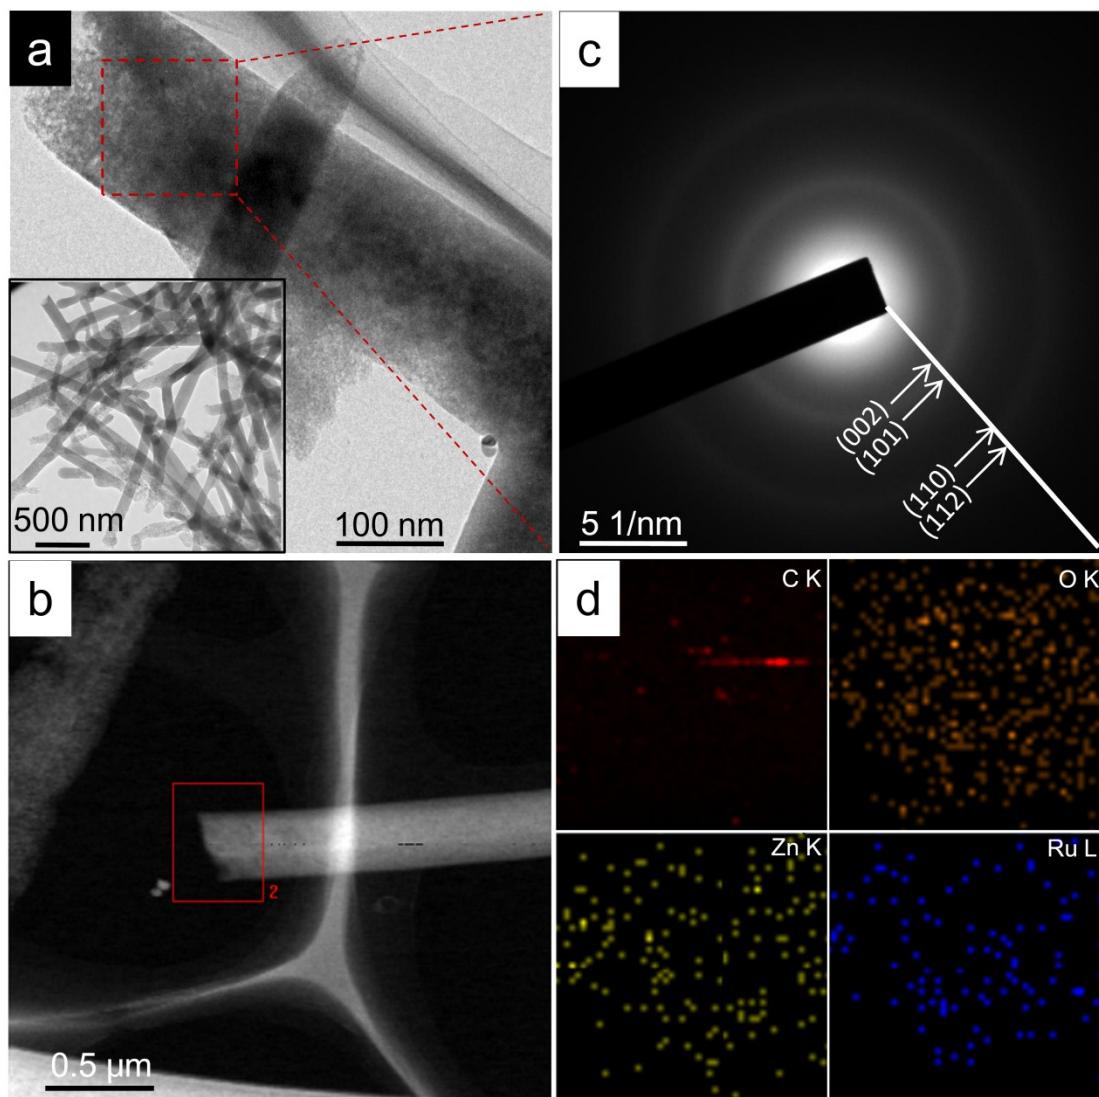

**Fig. 7** (a) TEM image, (b) SAED pattern, (c) HAADF-STEM and (d) elemental maps of 0.300Ru-CNF-750.

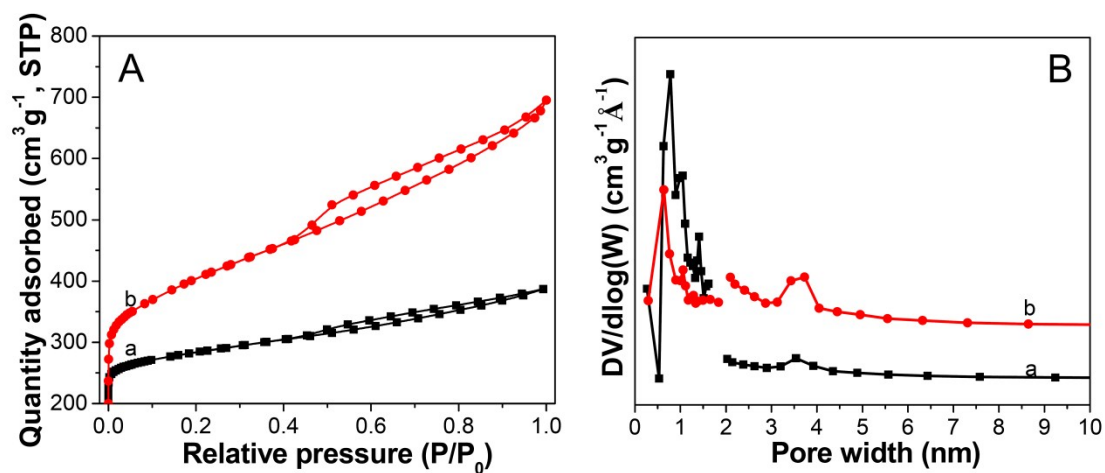

**Fig. S8** (A) N<sub>2</sub> adsorption/desorption isotherms and (B) the corresponding pore size distribution curves of (a) 0.300Ru-ZnCNF-750 and (b) 0.300Ru-CNF-750.

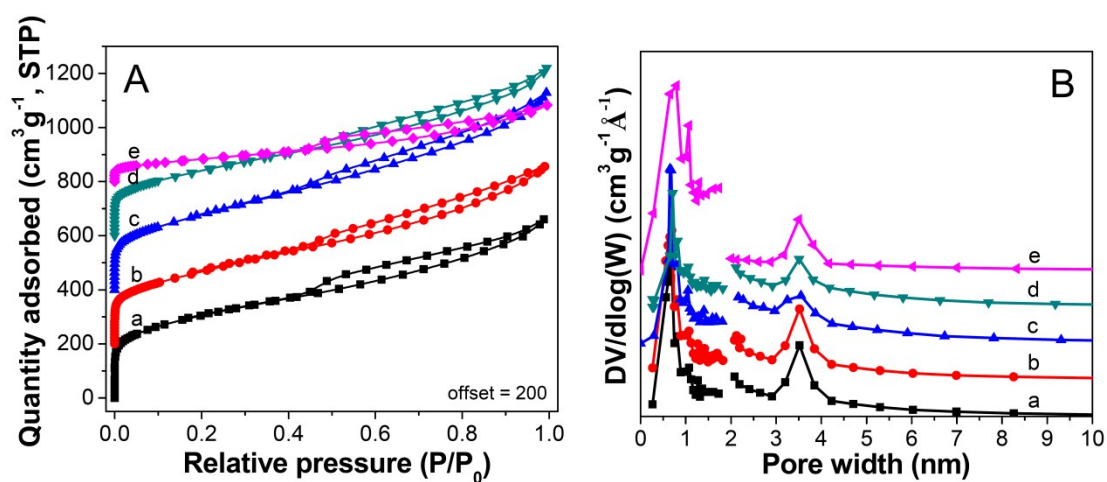

**Fig. S9** (A) N<sub>2</sub> adsorption/desorption isotherms and (B) the corresponding pore size distribution curves of (a) 0.025Ru-CNF, (b) 0.050Ru-CNF, (c) 0.100Ru-CNF, (d) 0.500Ru-CNF and (e) 0.300Ru-CNF-p.



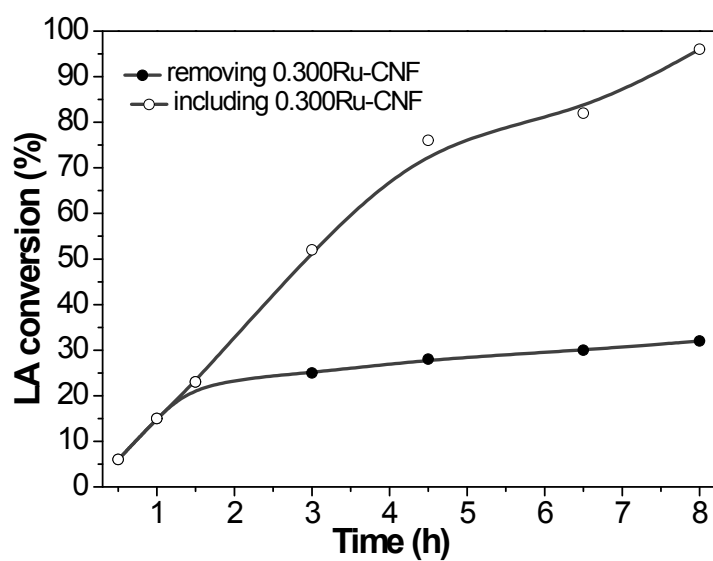

**Fig. S10.** Time-conversion plot of LA hydrogenation using 0.300Ru-CNF. Heterogeneous reaction check for catalyst by continuing the reaction after removing the catalyst by filtration at reaction temperature. Reaction conditions: LA 5.0 g (43 mmol), catalyst 4 wt% (200 mg), H<sub>2</sub> 4.5 MPa, 8 h and 150 °C.

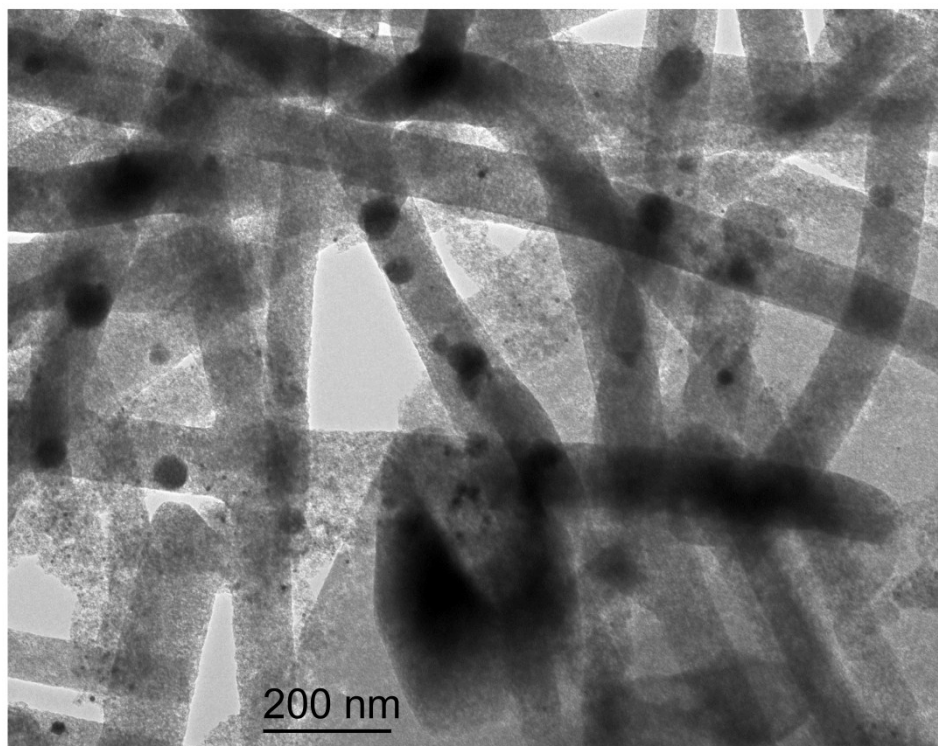

**Fig. S11** TEM image of spent 0.300Ru-CNF.
